# Supplementary material
Source: Research Square preprint supplement (doi:10.21203/rs.3.rs-9912143/v1)
Supplement: Supplementary file 1 [file 9e4c71284950bf379ae6cafb.docx]

# **Supplementary material 2**

**The Impact of Obesity on Appetite Regulation During Nutritional Ketosis**

Mateusz Grabowski 1 *, Konstancja Grabowska 2, Marta Nowacka-Chmielewska 1, Andrzej Małecki 1, Halina Jędrzejowska-Szypułka 2, Jarosław J Barski 2, Daniela Liśkiewicz 1, 3

1 Laboratory of Molecular Biology, Institute of Physiotherapy and Health Sciences, Academy of Physical Education, Katowice, Poland

2 Department of Physiology, Faculty of Medical Sciences in Katowice, Medical University of Silesia, Katowice, Poland

3 Institute of Diabetes and Obesity, Helmholtz Center Munich, Germany

*** Corresponding author:** m.grabowski@awf.katowice.pl

**keywords:** obesity, nutritional ketosis, appetite regulation, hypothalamus


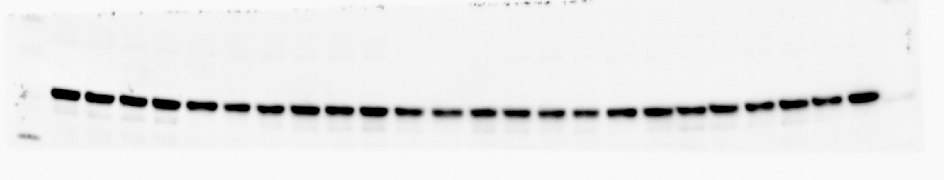


**Figure 1.** Chemiluminescence visualization of Ghsr in the hypothalamus - bands on western blot membrane.


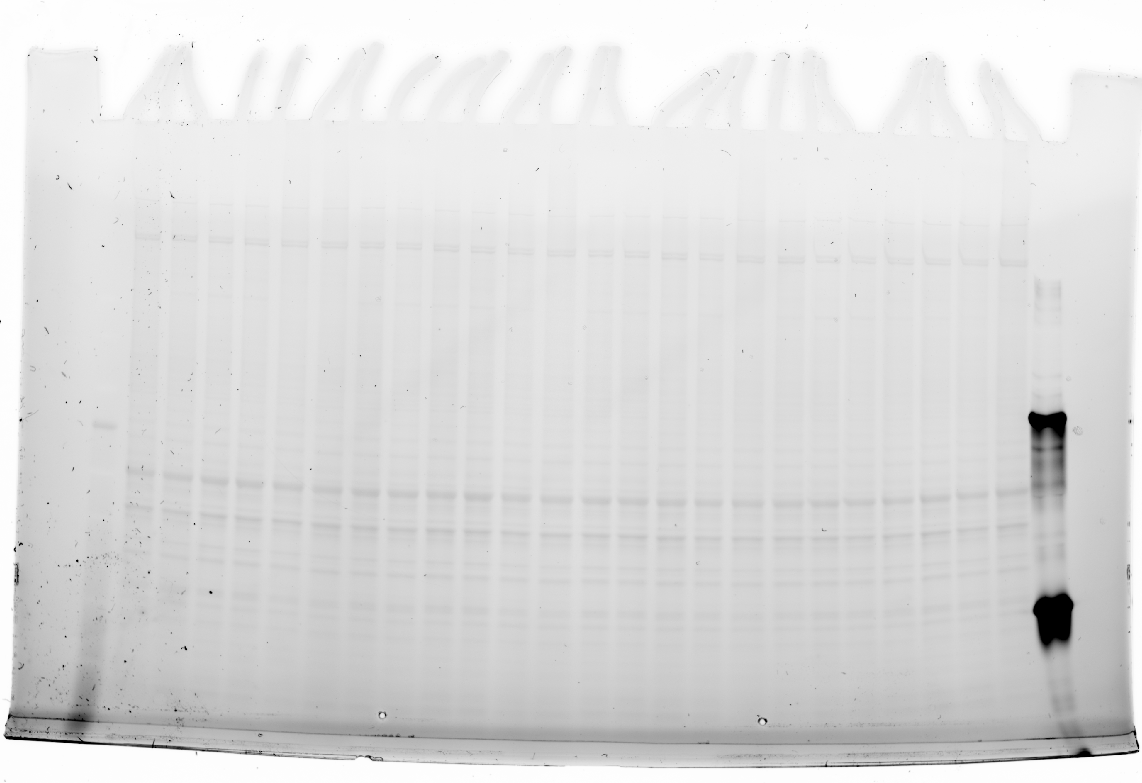


**Figure 2.** Visualization of total protein on polyacrylamide pre-cast gel (Bio-Rad) after electrophoresis under UV light as loading control to Ghsr in the hypothalamus.


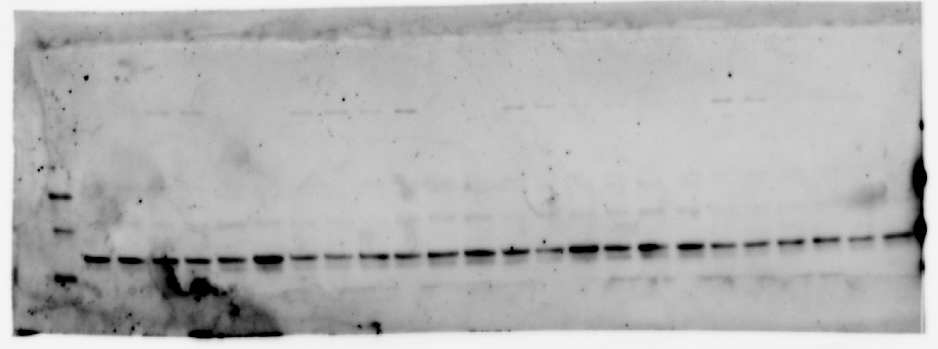


**Figure 3.** Chemiluminescence visualization of Lepr in the hypothalamus bands on western blot membrane.


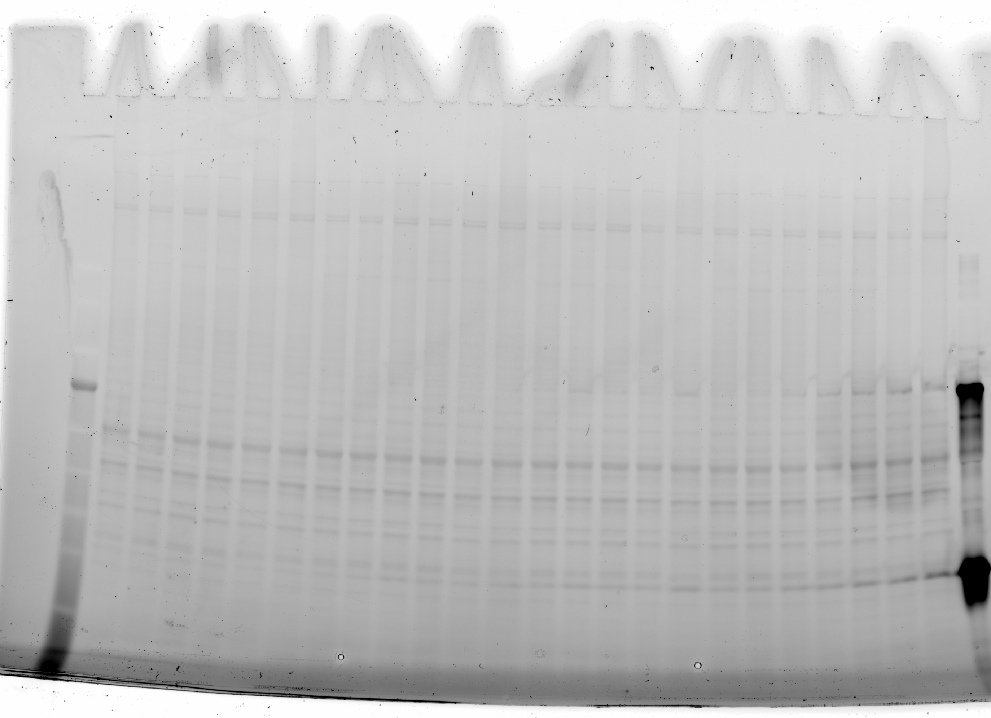


**Figure 4.** Visualization of total protein on polyacrylamide pre-cast gel (Bio-Rad) after electrophoresis under UV light as loading control to Lepr in the hypothalamus.

**
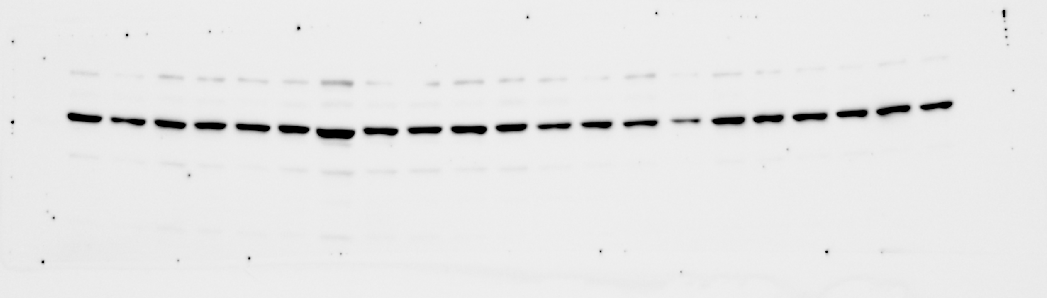
**

**Figure 5.** Chemiluminescence visualization of Cckar in the hypothalamus bands on western blot membrane.


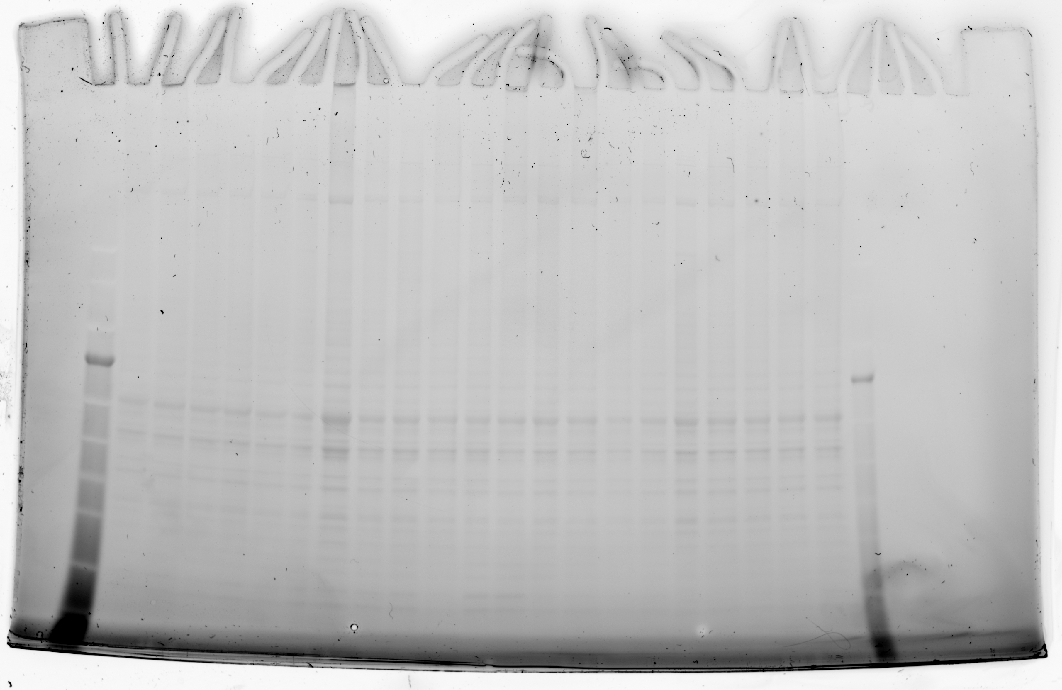


**Figure 6.** Visualization of total protein on polyacrylamide pre-cast gel (Bio-Rad) after electrophoresis under UV light as loading control to Cckar in the hypothalamus.
