# Supplementary material
Source: Research Square preprint supplement (doi:10.21203/rs.3.rs-9912143/v1)
Supplement: Supplementary file 2 [file c0ebd8db037bb86a84484062.docx]

# **Supplementary material 1**

**The Impact of Obesity on Appetite Regulation During Nutritional Ketosis**

Mateusz Grabowski 1 *, Konstancja Grabowska 2, Marta Nowacka-Chmielewska 1, Andrzej Małecki 1, Halina Jędrzejowska-Szypułka 2, Jarosław J Barski 2, Daniela Liśkiewicz 1, 3

1 Laboratory of Molecular Biology, Institute of Physiotherapy and Health Sciences, Academy of Physical Education, Katowice, Poland

2 Department of Physiology, Faculty of Medical Sciences in Katowice, Medical University of Silesia, Katowice, Poland

3 Institute of Diabetes and Obesity, Helmholtz Center Munich, Germany

*** Corresponding author:** m.grabowski@awf.katowice.pl

**keywords:** obesity, nutritional ketosis, appetite regulation, hypothalamus

**Table 1.** Characteristics of the standard chow (Labofeed B, Wytwórnia Pasz Morawski) used in the experiment.

| **Labofeed B composition (per kg)** | | | |
| --- | --- | --- | --- |
| composition | | nutritional profile | |
| Protein (g) | 175 | Total calories (kcal) | 2747 |
| *Soybean meal (%)* | 8 | Protein (kcal, %) | 25 |
| *Potato protein (%)* | 3 | Fat (kcal, %) | 8 |
| *Feed yeast (%)* | 3 | Carbohydrates (kcal, %) | 67 |
| Fat (g) | 2.8 |  | |
| Fiber (g) | 70 |
| Starch (g) | 330 |
| Ash (g) | 57 |
| Calcium (g) | 9.5 |
| Phosphorus (g) | 6.5 |
| Magnesium (g) | 3 |
| Potassium (g) | 7.5 |
| Sodium (g) | 1.9 |
| Sulfur (g) | 1.9 |
| Iron (mg) | 144 |
| Manganese (mg) | 50 |
| Zink (mg) | 50 |
| Copper (mg) | 11 |
| Iodine (mg) | 0.2 |
| Selenium (mg) | 0.4 |
| Vitamin A (UI) | 12000 |
| Vitamin D3 (UI) | 800 |
| Vitamin E (mg) | 78 |
| Vitamin K3 (mg) | 2.4 |
| Vitamin B1 (mg) | 8 |
| Vitamin B2 (mg) | 7 |
| Vitamin B6 (mg) | 11 |
| Vitamin B12 (mg) | 42 |
| Pantothenic acid (mg) | 25 |
| Folic acid (mg) | 2 |
| Biotin (mg) | 0.3 |

**Table 2.** Characteristics of the western chow used in the experiment.

| **Western chow composition** | | | | | | |
| --- | --- | --- | --- | --- | --- | --- |
| **Ingredient** | **Total kcal/100g** | **Protein g** | **Total fat g** | **Total Carbohydrate g** | **Dietary fiber g** | **Sodium g** |
| Polish dry sausage made of pork; Tarczyński | 611 | 26 | 55 | 3 | 0 | 3.3 |
| Tilsit cheese Hochland | 356 | 25.6 | 27.9 | 0.1 | 0 | 1.25 |
| potato chips; Lays Salt, Pepsci Co. | 526 | 32 | 52 | 5.9 | 1.4 | 4.4 |
| crakers | 476 | 8.8 | 21 | 62 | 1.7 | 2.3 |
| (Lajkonik) |
| Candy bar Bounty (Mars Inc.) | 488 | 3.7 | 26.1 | 58.3 | 0 | 0.26 |
| Candy bar Mars (Mars Inc.) | 452 | 3.7 | 17 | 70.3 | 0 | 0.39 |
| 10% fructose solution | 398 | 0 | 0 | 99.8 | 0 | 0 |
| **Name** | **Western chow - Set 1** | | | **Western chow - Set 2** | | |
| Content | Sausage | | | Tilsit cheese | | |
| Crakers | | | Potato chips | | |
| Candy bar (Mars) | | | Candy bar (Bounty) | | |
| Total (kcal/g) | 4.56 | | | 5.13 | | |
| kcal/g of fats | 2.79 | | | 3.15 | | |
| % of fats | 31 % | | | 35.3 % | | |
| kcal/g of proteins | 0.48 | | | 0.80 | | |
| % of proteins | 12.8 % | | | 20.4 % | | |
| kcal/g of carbohydrates | 1.8 | | | 0.85 | | |
| % of carbohydrates | 45.1 % | | | 21.4 % | | |

**Table 3.** Characteristics of the ketogenic chow (Wytwórnia Pasz Morawski) used in the experiment.

| **Composition** | **Component** | **(g/100g)** |
| --- | --- | --- |
|  | Lard | 41.46 |
| Butter | 18 |
| Vegetable shortening (Planta) | - |
| Corn oil | 9 |
| Arbocel | 9 |
| Casein | 17.5 |
| Fooder salt | 0.4 |
| Choline chloride 50% | 0.38 |
| Monocalcium phosphate | 2 |
| Fodder chalk | 1 |
| Vitamin mix | 1 |
| Methionine | 0.26 |
| **Nutritional profile** | Carbohydrate | 1.6 |
|  | Fiber | 0.5 |
| Protein | 12.9 |
| Total fat | 61.5 |
| Ratio (fat : carb + protein) | 4.2:1 |

**Table 4.** Producers, catalog numbers of primary antibodies, blocking buffers, antibodies diluents, dilutions of primary and secondary antibodies.

| **Primary antibody** | **Producer, catalog number** | **Dilution of primary antibody** | **Blocking buffer** | **Primary antibody diluent** | **Secondary antibody diluent*** | **Dilution of secondary antibody*** |
| --- | --- | --- | --- | --- | --- | --- |
| **anti-Cckar** | Bioss, bs-11514R | 1:1000 | 1x TBST with 1% BSA | 1x TBST with 1% BSA | 1x TBST with 1% BSA | 1:5000 |
| **anti-Ghsr** | Invitrogen, PA5-28752 | 1:1000 | 1x TBST with 5% NFDM | 1x TBST with 5% NFDM | 1x TBST with 5% NFDM | 1:4000 |
| **anti-Lepr** | Invitrogen, PA5-119252 | 1:750 | 1x casein/ H2O | 1x casein/ H2O | 1x casein/ H2O | 1:4000 |

*The secondary antibody was used: (11-035-003, Jackson Immunoresearch Laboratories). BSA – bovine serum albumin, TBST – tris buffered saline with Tween 20, NFDM – non-fat dry milk.

**Table 5.** List of primers used in the experiment.

| **Gene** | **Sequence 5’ 3’** |
| --- | --- |
| ***Actb*** | F: CTGTCGAGTCGCGTCCA |
| R: TCCATGGCGAACTGGTGG |
| ***Agrp*** | F: ACCTTAGGGAGGCACCTCAT |
| R: AGCAACATTGCAGTCAGCAT |
| ***Atp5j*** | F: GTCCAGGGGTATTACAGGCAA |
| R: TCAGGAATCAGCCCAAGACG |
| ***Cart*** | F: ACGAGAAGGAGCTGCCAAG |
| R: GCTCTCCAGCGTCACACAT |
| ***Cckar*** | F: AAAGAATGGCAGTCTGCAGTG |
| R: GATAACCAGCGTGTTCCCCA |
| ***Ghsr*** | F: GCCGATAGAGTGACAGGCTTC |
| R: CAGAGAGTGAGTCGTTGCCG |
| ***Glp1r*** | F: GGGCCAGTAGTGTGCTACAA |
| R: CTTCACACTCCGACAGGTCC |
| ***Lepr*** | F: CCTGGGCACAAGGACTGAAT |
| R: TGGACTGTTGGGAAGTTGGTA |
| ***Mc3r*** | F: GACGGGACGTAAAAGGGTGT |
| R: CCTGGGTGCCTAGCAATGAA |
| ***Mc4r*** | F: CCCGAGGTGTTTGTGACTCT |
| R: GGGTGAGTGCAGGTTCTTGT |
| ***Npy*** | F: CCTGGGCACAAGGACTGAAT |
| R: TGGACTGTTGGGAAGTTGGTA |
| ***Pomc*** | F: GAAGATGCCGAGATTCTGCT |
| R: CTCCAGCGAGAGGTCGAGTT |

F – forward, R - reverse
