# Supplementary material
Source: Research Square preprint supplement (doi:10.21203/rs.3.rs-9912143/v1)
Supplement: Supplementary file 3 [file cea1a858f5eafcd12d53e802.docx]

# **Supplementary material 3**

**The Impact of Obesity on Appetite Regulation During Nutritional Ketosis**

Mateusz Grabowski 1 *, Konstancja Grabowska 2, Marta Nowacka-Chmielewska 1, Andrzej Małecki 1, Halina Jędrzejowska-Szypułka 2, Jarosław J Barski 2, Daniela Liśkiewicz 1, 3

1 Laboratory of Molecular Biology, Institute of Physiotherapy and Health Sciences, Academy of Physical Education, Katowice, Poland

2 Department of Physiology, Faculty of Medical Sciences in Katowice, Medical University of Silesia, Katowice, Poland

3 Institute of Diabetes and Obesity, Helmholtz Center Munich, Germany

*** Corresponding author:** m.grabowski@awf.katowice.pl

**keywords:** obesity, nutritional ketosis, appetite regulation, hypothalamus

**Table 1. Results of the two-way ANOVA analysis of** ∆ body mass (%) during 6 weeks of DIO phase.

| **Parameter** | **Time** | | **Diet** | | **Interaction (time x grup)** | |
| --- | --- | --- | --- | --- | --- | --- |
| **F (DFn, DFd)** | **p-value** | **F (DFn, DFd)** | **p-value** | **F (DFn, DFd)** | **p-value** |
| ∆ body mass [%] | F (6, 168) = 48.09 | p<0.0001 | F (1, 168) = 146.90 | p<0.0001 | F (6, 168) = 18.37 | p<0.0001 |

**Table 2. Results of Sidak's multiple comparisons analysis of** ∆ body mass (%) during 6 weeks of DIO phase.

| **week of DIO phase** | 0 | 1 | 2 | 3 | 4 | 5 | 6 |
| --- | --- | --- | --- | --- | --- | --- | --- |
| **p-value** | >0.9999 | >0.9999 | 0.5589 | 0.0002 | <0.0001 | <0.0001 | <0.0001 |

**Table 3. Results of the two-way ANOVA analysis of appetitive behavior after 2 weeks of ketogenic chow administrated.**

| **Parameter** | **Model** | | **Diet** | | **Interaction (model x diet)** | |
| --- | --- | --- | --- | --- | --- | --- |
| **F (DFn, DFd)** | **p-value** | **F (DFn, DFd)** | **p-value** | **F (DFn, DFd)** | **p-value** |
| **The palatable snack test** | | | | | | |
| snack consumed (g) | F (1, 46) = 1.733 | P=0.1946 | F (1, 46) = 15.61 | P=0.0003 | F (1, 46) = 0.056 | P=0.8142 |
| frequency of snack sniffing | F (1, 47) = 0.0004 | P=0.9832 | F (1, 47) = 29.49 | P<0.0001 | F (1, 47) = 1.567 | P=0.2169 |
| snack exploration time (s) | F (1, 47) = 2.355 | P=0.1316 | F (1, 47) = 4.982 | P=0.0304 | F (1, 47) = 0.067 | P=0.7962 |
| **The risk–snack competition test** | | | | | | |
| snack consumed (g) | F (1, 46) = 0.1069 | P=0.7452 | F (1, 46) = 19.12 | P<0.0001 | F (1, 46) = 0.3019 | P=0.5853 |
| frequency of snack sniffing | F (1, 43) = 4.186 | P=0.0469 | F (1, 43) = 15.37 | P=0.0003 | F (1, 43) = 0.01217 | P=0.9127 |
| snack exploration time (s) | F (1, 44) = 1.067 | P=0.3073 | F (1, 44) = 9.292 | P=0.0039 | F (1, 44) = 0.5878 | P=0.4474 |

**Table 4.** Results of the two-way ANOVA of open field test and elevated plus maze after 2 weeks of ketogenic chow administrated.

| **Parameter** | **Model** | | **Diet** | | **Interaction (model x diet)** | |
| --- | --- | --- | --- | --- | --- | --- |
| F (DFn, DFd) | p-value | F (DFn, DFd) | p-value | F (DFn, DFd) | p-value |
| **Open Field Test** | | | | | | |
| total distance traveled (m) | F (1, 47) = 0.0096 | P=0.9224 | F (1, 47) = 0.0191 | P=0.8905 | F (1, 47) = 0.1742 | P=0.6783 |
| time spent in the center of the area (s) | F (1, 47) = 4.0140 | P=0.0509 | F (1, 47) = 0.3440 | P=0.5603 | F (1, 47) = 0.0295 | P=0.8643 |
| time spent in the periphery of the area (s) | F (1, 46) = 0.0013 | P=0.9710 | F (1, 46) = 0.2746 | P=0.6028 | F (1, 46) = 0.1022 | P=0.7507 |
| **Elevated Plus Maze** | | | | | | |
| time spend in closed arms (s) | F (1, 47) = 0.0290 | P=0.8655 | F (1, 47) = 0.1564 | P=0.6943 | F (1, 47) = 0.0748 | P=0.7856 |
| time spend in open arms (s) | F (1, 37) = 0.0270 | P=0.8704 | F (1, 37) = 0.0795 | P=0.7795 | F (1, 37) = 0.0212 | P=0.8850 |
| head dip area (number) | F (1, 47) = 0.0478 | P=0.8277 | F (1, 47) = 0.0047 | P=0.9455 | F (1, 47) = 0.1552 | P=0.6954 |

**Table 5.** Results of the two-way ANOVA followed by Šídák's multiple comparisons analysis of ∆ body mass (%) between LEAN and DIO mice after 2 weeks of ketogenic chow administrated.

| **Data** | **LEAN-SD vs. LEAN-KD** | | **DIO-SD vs. DIO-KD** | |
| --- | --- | --- | --- | --- |
| **2-way ANOVA** | | | | |
| Source of Variation | F (DFn, DFd) | P value | F (DFn, DFd) | P value |
| Time x diet | F (5, 115) = 12.24 | P<0.0001 | F (5, 115) = 14,93 | P<0.0001 |
| Time | F (2.535, 58.30) = 7.913 | P=0.0004 | F (1.822, 41.90) = 37,54 | P<0.0001 |
| diet | F (1, 23) = 3.038 | P=0.0947 | F (1, 23) = 20.72 | P=0.0001 |
| interaction | F (23, 115) = 13.35 | P<0.0001 | F (23, 115) = 17.48 | P<0.0001 |
| **Šídák's multiple comparisons test** | | | | |
| day of experiment | Mean Diff, | P value | Mean Diff, | P value |
| 1 | -3.303 | 0.6458 | 12.2 | 0.0113 |
| 4 | 3.429 | 0.6224 | 15.22 | 0.0006 |
| 8 | 4.845 | 0.2041 | 13.9 | 0.0014 |
| 11 | 5.158 | 0.3089 | 14.02 | 0.0004 |
| 14 | 8.587 | 0.0042 | 14.33 | 0.0006 |

**Table 6.** Results of the three-way ANOVA analysis of food intake, and caloric intake after 2 weeks of ketogenic chow administrated.

| **Parameter** | **Food intake** | | **Caloric intake** | |
| --- | --- | --- | --- | --- |
| **F (DFn, DFd)** | **p-value** | **F (DFn, DFd)** | **p-value** |
| Time | F(3,63) = 13.24 | <0.0001 | F(2.386,50.10) = 10.79 | <0.0001 |
| DIO | F(1,21) = 15.21 | 0.0008 | F(1,21) = 10.88 | 0.0034 |
| KD | F(1,21) = 62.07 | <0.0001 | F(1,21) = 0.0033 | 0.9548 |
| Time × DIO | F(3,63) = 11.83 | <0.0001 | F(3,63) = 8.84 | <0.0001 |
| Time × KD | F(3,63) = 2.07 | 0.1132 | F(3,63) = 4.66 | 0.0053 |
| DIO × KD | F(1,21) = 1.69 | 0.2073 | F(1,21) = 1.41 | 0.2479 |
| Time × DIO × KD | F(3,63) = 7.28 | 0.0003 | F(3,63) = 0.51 | 0.6738 |

**Table 7.** Results of Tukey's multiple comparisons test of food intake and caloric intake data after 2 weeks of ketogenic chow administrated.

| Food intake -Tukey's multiple comparisons test | | |
| --- | --- | --- |
| Comparison (Day-specific) | Mean Diff | Adjusted P value |
| Day 4: LEAN-SD vs LEAN-KD | 2.407 | <0.0001 |
| Day 4: LEAN-SD vs DIO-SD | 2.558 | <0.0001 |
| Day 4: LEAN-SD vs DIO-KD | 3.150 | <0.0001 |
| Day 8: LEAN-SD vs DIO-SD | 1.890 | 0.0001 |
| Day 8: LEAN-SD vs DIO-KD | 2.989 | <0.0001 |
| Day 11: LEAN-SD vs LEAN-KD | 2.766 | 0.0139 |
| Day 11: LEAN-SD vs DIO-KD | 2.372 | <0.0001 |
| Day 11: DIO-SD vs DIO-KD | 2.076 | <0.0001 |
| Day 14: LEAN-SD vs LEAN-KD | 1.682 | 0.0018 |
| Day 14: LEAN-SD vs DIO-KD | 1.459 | 0.0091 |
| Caloric intake - Tukey's multiple comparisons test | | |
| Comparison (Day-specific) | Mean Diff | Adjusted P value |
| Day 4: LEAN-KD vs Day 8: LEAN-KD | 5.041 | 0.0109 |
| Day 4: LEAN-KD vs Day 14: LEAN-KD | 4.998 | 0.0407 |
| Day 4: DIO-SD vs Day 11: DIO-SD | -6.353 | 0.0346 |

**Table 8.** Results of the two-way ANOVA of hormones, biochemical serum factors, and lipid profile after 2 weeks of ketogenic chow administrated.

| **Parameter** | **Model** | | **Diet** | | **Interaction (model x diet)** | |
| --- | --- | --- | --- | --- | --- | --- |
| **F (DFn, DFd)** | **p-value** | **F (DFn, DFd)** | **p-value** | **F (DFn, DFd)** | **p-value** |
| serum ghrelin concentration (ng/ml) | F (1, 36) = 20.73 | P<0.0001 | F (1, 36) = 0.2457 | P=0.6231 | F (1, 36) = 0.2169 | P=0.6442 |
| serum leptin concentration (pg/ml) | F (1, 41) = 22.69 | P<0.0001 | F (1, 41) = 0.00008 | P=0.9928 | F (1, 41) = 1.727 | P=0.1961 |
| serum GLP-1 concentration (ng/ml) | F (1, 30) = 33.71 | P<0.0001 | F (1, 30) = 7.531 | P=0.0101 | F (1, 30) = 3.400 | P=0.0751 |
| serum CCK concentration (ng/ml) | F (1, 42) = 14.35 | P=0.0005 | F (1, 42) = 2.181 | P=0.1472 | F (1, 42) = 0.1491 | P=0.7013 |
| serum fasting insulin concentration (ng/ml) | F (1, 29) = 4.998 | P=0.0332 | F (1, 29) = 5.173 | P=0.0305 | F (1, 29) = 1.218 | P=0.2788 |
| blood fasting glucose concentration (g/dl) | F (1, 47) = 38.40 | P<0.0001 | F (1, 47) = 1.759 | P=0.1912 | F (1, 47) = 2.227 | P=0.1423 |
| blood postprandial glucose concentration (g/dl) | F (1, 47) = 0.5937 | P=0.4448 | F (1, 47) = 152.1 | P<0.0001 | F (1, 47) = 0.6317 | P=0.4307 |
| blood BHB concentration (mM) | F (1, 47) = 4.943 | P=0.0310 | F (1, 47) = 202.0 | P<0.0001 | F (1, 47) = 5.302 | P=0.0258 |
| serum FFA concentration (mM) | F (1, 43) = 2.406 | P=0.1282 | F (1, 43) = 84.80 | P<0.0001 | F (1, 43) = 0.4800 | P=0.4922 |
| serum cholesterol concentration (mg/dL) | F (1, 44) = 16.15 | P=0.0002 | F (1, 44) = 139.6 | P<0.0001 | F (1, 44) = 3.428 | P=0.0708 |
| HDL/LDL ratio | F (1, 42) = 0.2702 | P=0.6059 | F (1, 42) = 13.74 | P=0.0006 | F (1, 42) = 0.1940 | P=0.6619 |
| serum triglicerides concentration (mg/dL) | F (1, 43) = 0.2708 | P=0.6055 | F (1, 43) = 0.750 | P=0.3910 | F (1, 43) = 0.0006 | P=0.9803 |

**Table 9.** Results of the two-way ANOVA analysis of genes expression in hypothalamus after 2 weeks of ketogenic chow administrated.

| **Parameter** | **Model** | | **Diet** | | **Interaction (model x diet)** | |
| --- | --- | --- | --- | --- | --- | --- |
| **F (DFn, DFd)** | **p-value** | **F (DFn, DFd)** | **p-value** | **F (DFn, DFd)** | **p-value** |
| *Agrp* | F (1, 15) = 9.071 | P=0.0088 | F (1, 15) = 16.15 | P=0.0011 | F (1, 15) = 6.573 | P=0.0216 |
| *Cart* | F (1, 12) = 0.506 | P=0.4905 | F (1, 12) = 14.66 | P=0.0024 | F (1, 12) = 0.575 | P=0.4629 |
| *Cckar* | F (1, 17) = 8.525 | P=0.0096 | F (1, 17) = 0.312 | P=0.5837 | F (1, 17) = 0.600 | P=0.4490 |
| *Ghsr* | F (1, 16) = 0.387 | P=0.5422 | F (1, 16) = 0.223 | P=0.6427 | F (1, 16) = 0.119 | P=0.7342 |
| *Glp1r* | F (1, 18) = 2.844 | P=0.1089 | F (1, 18) = 0.263 | P=0.6140 | F (1, 18) = 2.099 | P=0.1646 |
| *Lepr* | F (1, 12) = 0.555 | P=0.4704 | F (1, 12) = 10.38 | P=0.0073 | F (1, 12) = 1.073 | P=0.3206 |
| *Mc3r* | F (1, 13) = 2.911 | P=0.1117 | F (1, 13) = 10.14 | P=0.0072 | F (1, 13) = 0.189 | P=0.6710 |
| *Mc4r* | F (1, 16) = 13.43 | P=0.0021 | F (1, 16) = 0.062 | P=0.8067 | F (1, 16) = 0.768 | P=0.3939 |
| *Npy* | F (1, 16) = 2.041 | P=0.1724 | F (1, 16) = 3.314 | P=0.0875 | F (1, 16) = 0.114 | P=0.7398 |
| *Pomc* | F (1, 14) = 0.104 | P=0.7524 | F (1, 14) = 0.376 | P=0.5494 | F (1, 14) = 0.885 | P=0.3626 |

**Table 10**. Results of the two-way ANOVA analysis of protein expression in hypothalamus after 2 weeks of ketogenic chow administrated.

| **Parameter** | **Model** | | **Diet** | | **Interaction (model x diet)** | |
| --- | --- | --- | --- | --- | --- | --- |
| **F (DFn, DFd)** | **p-value** | **F (DFn, DFd)** | **p-value** | **F (DFn, DFd)** | **p-value** |
| *Cckar* | F (1, 17) = 8.236 | P=0.0106 | F (1, 17) = 1.300 | P=0.2700 | F (1, 17) = 1.115 | P=0.3058 |
| *Ghsr* | F (1, 20) = 10.65 | P=0.0039 | F (1, 20) = 4.380 | P=0.0493 | F (1, 20) = 8.408 | P=0.0089 |
| *Lepr* | F (1, 20) = 7.104 | P=0.0149 | F (1, 20) = 11.66 | P=0.0027 | F (1, 20) = 0.4020 | P=0.5332 |
